# Supplementary material for: Geraniol suppresses prostate cancer growth through down‐regulation of E2F8
Source: PubMed Central journal article supplement (PMC5083744; doi:10.1002/cam4.864), 2016-09-28

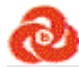

**KORAM BIOGEN CORP.**

6F, KORAM VENTURE TOWN  
907-1, DAECHE-DONG, KANGNAM-KU, SEOUL,  
135-280, SOUTH KOREA

TEL:82(2)556-0311(Rep.)  
FAX:82(2)556-0828 /9  
Email: koram@ korambiotech.com

**TO:** Seoul National University, Min-A Seol  
**CC:** Koramdeolab  
**RE:** Purchase of ATCC Item

**DATE :** 1/28/2016

**T.PAGES:** 1

This letter is to confirm that Min-A Seol from Seoul National University received item CRL-1435 (non-GMO item) from ATCC.

The rest of their contact information is as follows:

Address: Yeongeon-dong, Jongno-gu, Seoul, Korea, 110-799  
82-2-740-8217 phone  
82-2-3673-2167 fax

The import declaration information is as follows:

| ATCC product No. | AWB No.      | Date         |
|------------------|--------------|--------------|
| CRL-1435         | 774127335172 | 2015. 07. 27 |

**Korambiogen corp.**

**CEO & President**

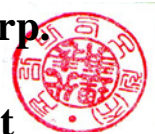

Supplement: CAM4-5-2899-s013.pdf [file CAM4-5-2899-s013.pdf]
